# Supplementary material
Source: publisher figshare collection journal article supplement (https://frontiersin.figshare.com/ndownloader/files/28540671)
Supplement: Supplementary file [file 28540671]

Supplementary Material

|                     |         |                                     |
|---------------------|---------|-------------------------------------|
| Interleukin-10      | Forward | 5'-CCCATTCTCGTCACGATCTC-3'          |
|                     | Reverse | 5'-TCAGACTGGTTTGGGATAGGTTT-3'       |
| TGF- $\beta$ 1      | Forward | 5'-CTCCCGTGGCTTCTAGTGC-3'           |
|                     | Reverse | 5'-GCCTTAGTTTGGACAGGATCTG-3'        |
| GAPDH               | Forward | 5'-CCAGGTTGTCTCCTGCGACTT-3'         |
|                     | Reverse | 5'-CCTGTTGCTGTAGCCGTATTCA-3'        |
| Foxp3-promoter      | Forward | 5'-TTCCTCCCGCTCTCTGACTCT-3          |
|                     | Reverse | 5'-AAGCGCCAGTTGTGTACAAATATC-3'      |
| Foxp3-CNS1          | Forward | 5'-GTTTTGTGTTTTAAGTCTTTTGCACCTTG-3' |
|                     | Reverse | 5'-CAGTAAATGGAAAAAATGAAGCCATA-3'    |
| <b>(For Taqman)</b> |         | <b>Cat#</b>                         |
| Hprt1               |         | Mm00446968_m1                       |
| Foxp3               |         | Mm00475162_m1                       |
| Tgfb1               |         | Mm00441724_m1                       |
| Il10                |         | Mm01288386_m1                       |
| Tnf                 |         | Mm00443258_m1                       |
| Tgfb1               |         | Mm00436964_m1                       |
| Tgfb2               |         | Mm03024091_m1                       |
| Smad6               |         | Mm00484738_m1                       |
| Smad7               |         | Mm00484742_m1                       |
| Rel                 |         | Mm01239661_m1                       |
| Tbx1                |         | Mm00448949_m1                       |
| Rorc                |         | Mm01261022_m1                       |
| Nfkb1               |         | Mm00446968_m1                       |
| Nfkb2               |         | Mm00476361_m1                       |
| Ikbkb               |         | Mm01222247_m1                       |
| Jun                 |         | Mm00495062_s1                       |
| Il2ra               |         | Mm01340213_m1                       |
| Il2rb               |         | Mm00434268_m1                       |
| Smad2               |         | Mm00487530_m1                       |
| Smad3               |         | Mm00489637_m1                       |
| Smad4               |         | Mm03023996_m1                       |
| Cd3e                |         | Mm01179194_m1                       |
| Icos                |         | Mm00497600_m1                       |
| Nfkbiz              |         | Mm00600522_m1                       |
| Cd44                |         | Mm01277161_m1                       |
| Stat5a              |         | Mm03053818_s1                       |
| Stat5b              |         | Mm0083989_m1                        |
| Jak1                |         | Mm00600614_m1                       |
| Hdac4               |         | Mm01299552_m1                       |
| Ifng                |         | Mm01168134_m1                       |
| Il2                 |         | Mm00434256_m1                       |
| Il5                 |         | Mm00439646_m1                       |
| Il13                |         | Mm00434204_m1                       |
| Inha                |         | Mm00439683_m1                       |
| Rorc                |         | Mm01261022_m1                       |
| Batf                |         | Mm00479410_m1                       |
| Stat3               |         | Mm00456961_m1                       |

|        |               |
|--------|---------------|
| Myd88  | Mm00440338_m1 |
| Myc    | Mm00487803_m1 |
| Hk1    | Mm00439344_m1 |
| Hk2    | Mm00443385_m1 |
| Socs1  | Mm00782550_s1 |
| Socs3  | Mm00545913_s1 |
| Slc2a1 | Mm00441480_m1 |
| Slc2a3 | Mm00441483_m1 |
| Runx1  | Mm01213404_m1 |
| Runx3  | Mm00490666_m1 |
| Tcf12  | Mm00441699_m1 |
| Cd274  | Mm03048248_m1 |
| Rara   | Mm01296312_m1 |
| Rora   | Mm01173766_m1 |

**Supplementary Table 1: Primers List**

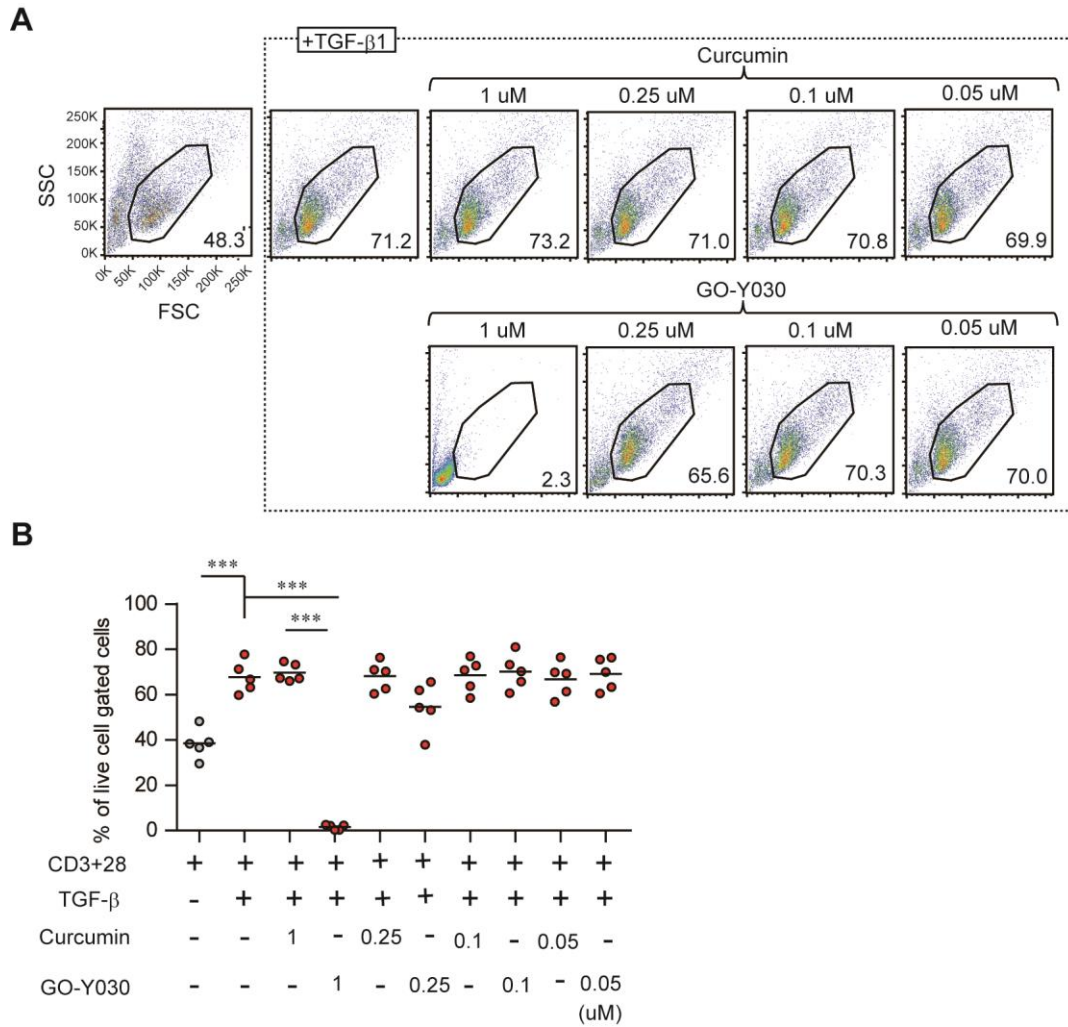

**Supplementary Figure 1: Naive CD4<sup>+</sup> T cells from C57/BL6 mice cultured in each concentration of GO-Y-030.**

(A, B) Representative SSC and FSC FACS analysis at five independent experiments. Purified naïve CD4<sup>+</sup> T cells cultured for three days, and then gated live cell population according to SSC and FSC. Statistical analyses were performed in each concentration between Curcumin and GO-Y030, and 2 ng/mL TGF- $\beta$  versus all.

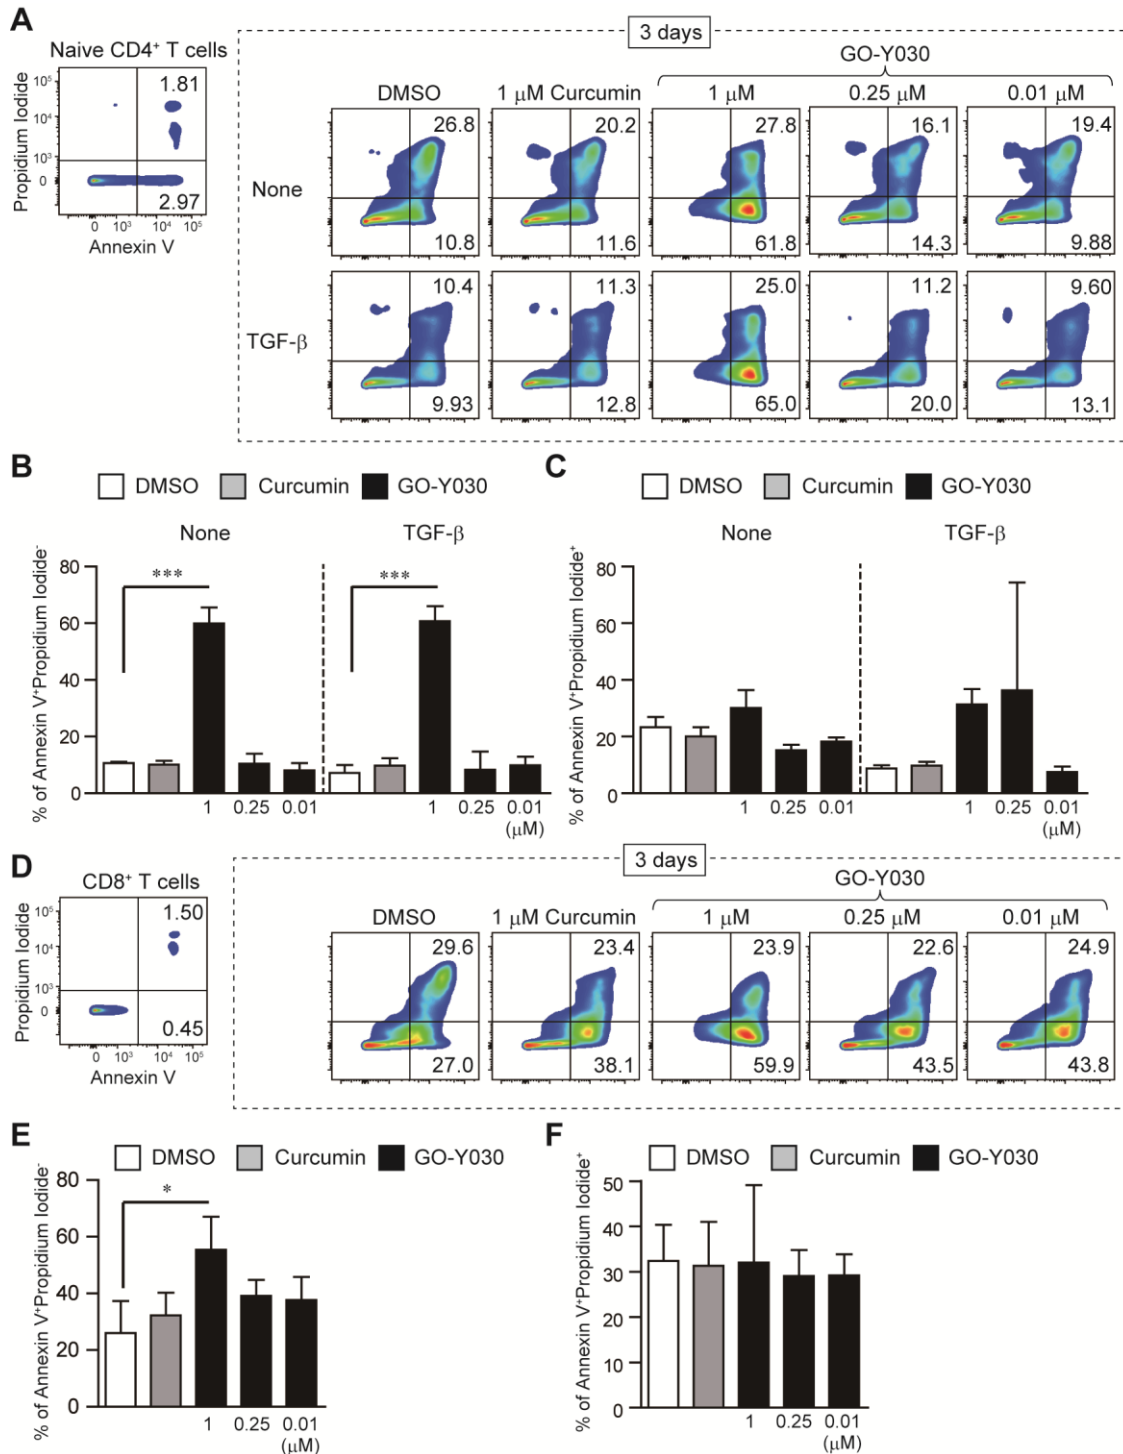

**Supplementary Figure 2: Effects of GO-Y-030 in T cell viability.**

(A) Representative Annexin V and Propidium Iodide FACS analyses at three independent experiments. Purified naïve CD4<sup>+</sup> T cells cultured for three days, and then gated CD4<sup>+</sup> cell population. (B, C) Statistic analyses were performed in each concentration between Curcumin and GO-Y030 versus DMSO control. One-way analysis of variance (ANOVA) with post-hoc Tukey's multiple comparisons test employed. (D) Representative Annexin V and Propidium Iodide FACS

analyses at three independent experiments. Purified naïve CD8<sup>+</sup> T cells cultured for three days, and then gated CD8<sup>+</sup> cell population. **(E, F)** Statistic analyses were performed in each concentration between Curcumin and GO-Y030 versus DMSO control. One-way ANOVA with post-hoc Tukey's multiple comparisons test employed.

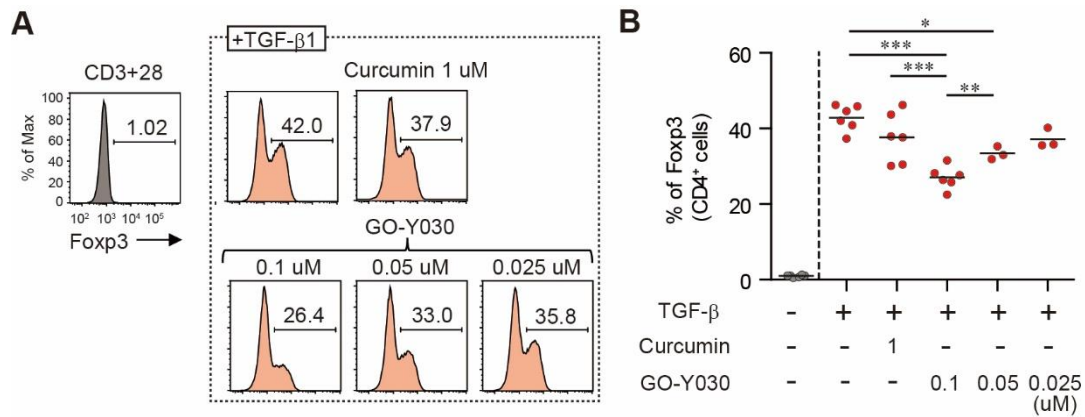

### Supplementary Figure 3: GO-Y030 prevent TGF- $\beta$ induced Foxp3<sup>+</sup>Tregs generation

(A, B) Frequency of Foxp3<sup>+</sup> Tregs in total CD4<sup>+</sup> cells. Splenic naïve CD4<sup>+</sup>T cells were cultured in the presence or absence of 2 ng/mL TGF- $\beta$ , 1  $\mu$ M curcumin, or 0.1-0.025  $\mu$ M GO-Y030 for three days. One-way analysis of variance (ANOVA) with post-hoc Tukey's multiple comparisons test employed.

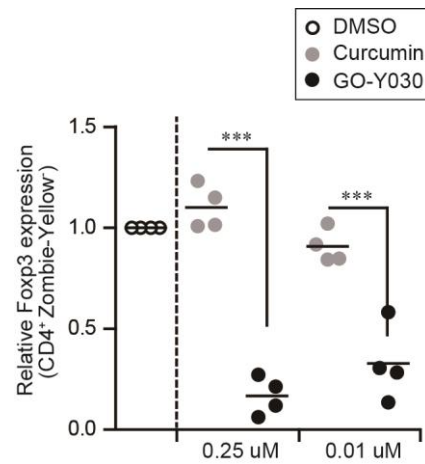

**Supplementary Figure 4: Relative Foxp3<sup>+</sup>Tregs in CD4<sup>+</sup>Zombie Yellow<sup>-</sup> T cells.**

Splenic naïve CD4<sup>+</sup> T cells were cultured in the presence of 2 ng/mL TGF- $\beta$  with or without curcumin or GO-Y030 for three days. Percentage of TGF- $\beta$ -induced Foxp3<sup>+</sup> population is as set as “1”. One-way analysis of variance (ANOVA) with post-hoc Tukey’s multiple comparisons test employed.

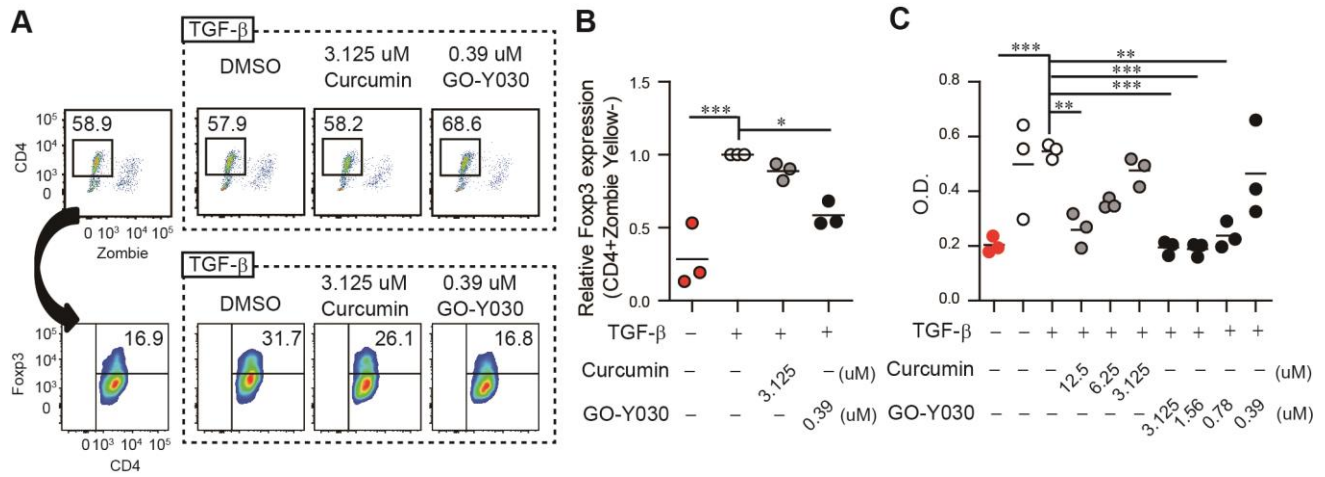

**Supplementary Figure 5: GO-Y030 prevents TGF- $\beta$ -induced Foxp3<sup>+</sup>Tregs in human naïve CD4<sup>+</sup> T cells.**

(A) Human naïve CD4<sup>+</sup>T cells were cultured in the presence of 2 ng/mL TGF- $\beta$ 1 with or without curcumin or GO-Y030 for three days. Data are one representative at three independent experiments. (B) Relative Foxp3 expression in CD4<sup>+</sup> T cells. TGF- $\beta$ 1 stimulation only is set as “1”. One-way analysis of variance (ANOVA) with post-hoc Dunnet’s multiple (vs. TGF- $\beta$ ) comparisons test employed. (C) Relative live cell counts. Human naïve CD4<sup>+</sup> T cells were cultured with or without 2 ng/mL TGF $\beta$  and concentrations of Curcumin or GO-Y030 as indicated for 72 h followed by the addition of the cell counting reagent. Red: No cells (Medium alone). Data are representative at three independent experiments using different healthy donors. One-way ANOVA with post-hoc Dunnet’s multiple (vs. TGF- $\beta$ ) comparisons test employed.



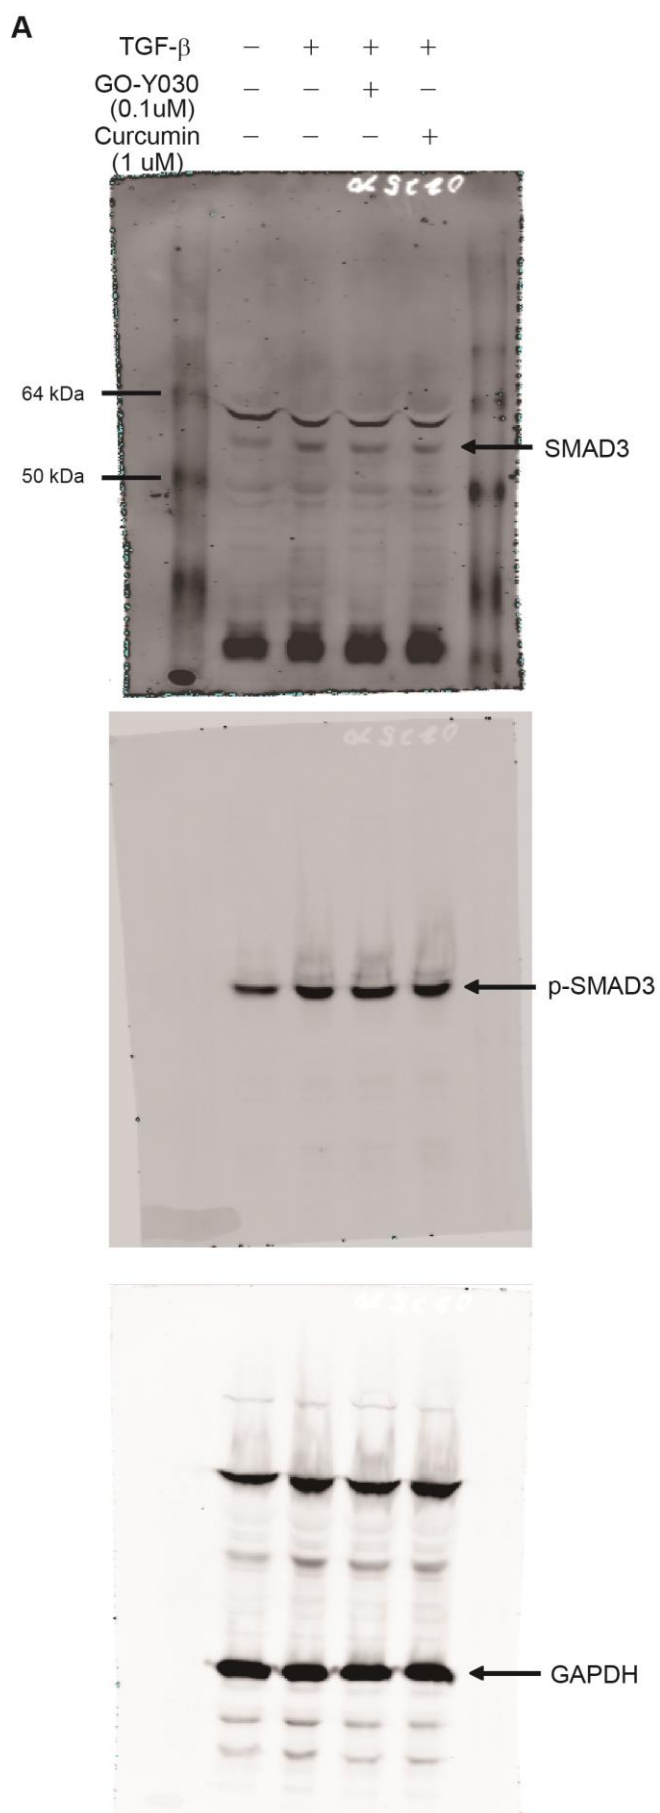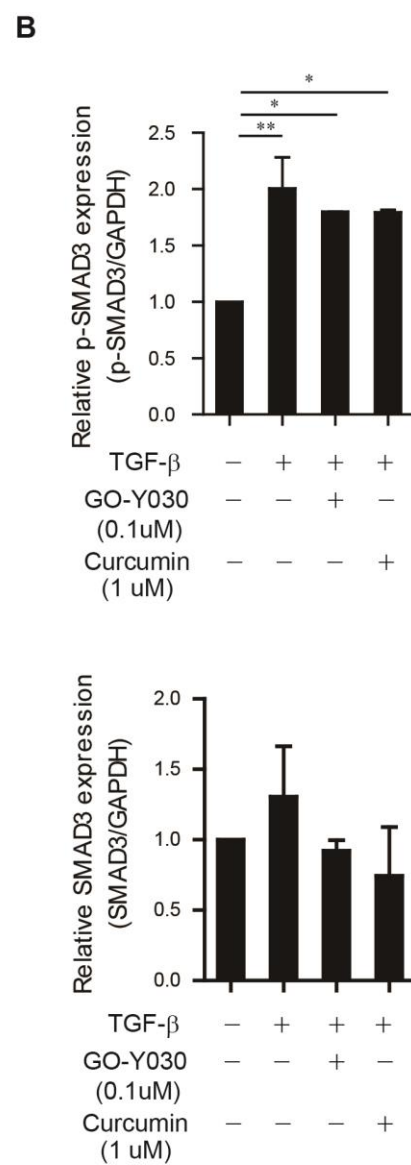

**Supplemental Figure 6: GO-Y030 does not affect TGF- $\beta$ -induced SMAD pathway.**

(A) Representative western blotting image of SMAD3, phospho-SMAD3 and GAPDH at three independent experiments. Naive CD4<sup>+</sup> T cells were stimulated with or without TGF- $\beta$  in the presence or absence of 0.1  $\mu$ M GO-Y030 or 1  $\mu$ M Curcumin. (B) Relative SMAD3 and phospho-SMAD3 expression. (n=3, Mean with standard error of the mean) Without TGF- $\beta$  and GO-Y030 stimulation was set as “1”. One-way analysis of variance (ANOVA) with post-hoc Tukey’s multiple comparisons test employed. One-way ANOVA with post-hoc Tukey’s multiple comparisons test employed.

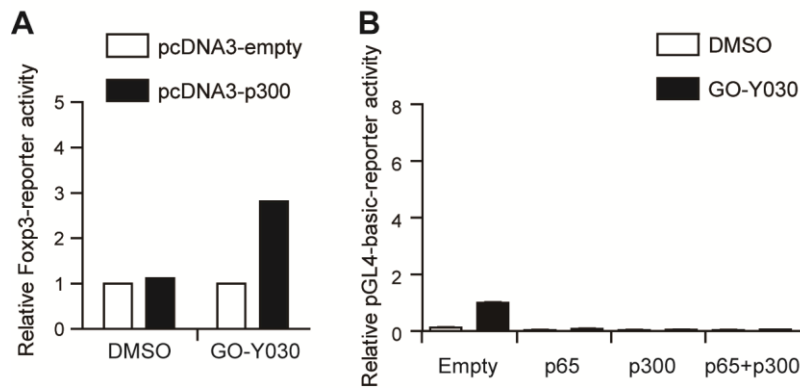

### Supplemental Figure 7: Relative murine Foxp3-promoter activity

(A) pGL4-Foxp3 promoter (-1702 to +174) activity were analyzed using the Duo-luciferase assay systems. DMSO- or 1.0  $\mu$ M GO-Y030 were treated HEK293 before 24 h electroporation. pcDNA3-empty vector transfection (Firefly/Renilla) was set as “1”. (B) pGL4-basic promoter (control) activity was analyzed using the Duoluciferase assay systems. DMSO- or 1.0  $\mu$ M GO-Y030 were treated HEK293 cells before 24 h transfection. Data are one representative at two independent experiments (n=2, Mean + standard deviation).

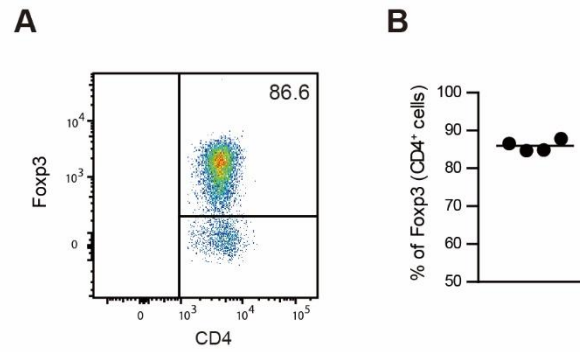

**Supplemental Figure 8: Representative Foxp3 expression in Tregs after CD4<sup>+</sup>CD25<sup>+</sup> isolation.**

(A, B) Splenic CD4<sup>+</sup>CD25<sup>+</sup> Tregs were isolated by using autoMACS (Milteny Biotech) and FACS analyses. Data are one representative of three independent experiments.

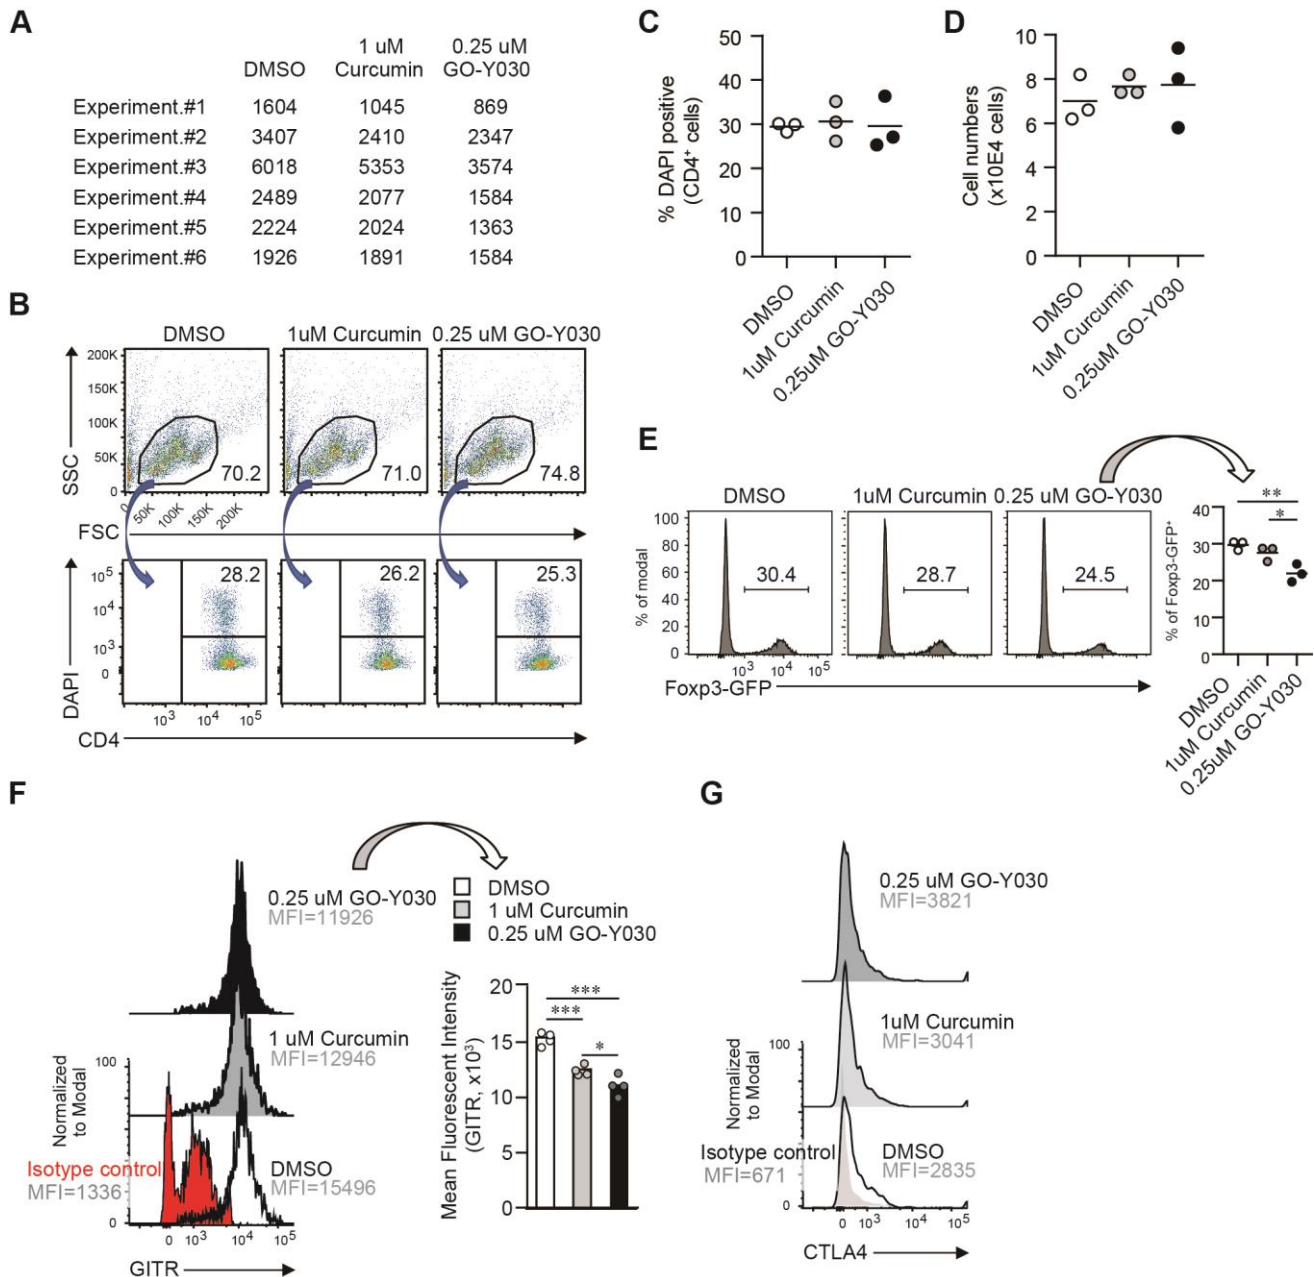

### Supplemental Figure 9: Phenotype of Cultured CD4<sup>+</sup>CD25<sup>+</sup> Tregs.

(A) Foxp3 Mean fluorescence Intensity in CD4<sup>+</sup>Foxp3<sup>+</sup> Treg populations in Figure.3A. Data shows six independent experiments. experiments. (B, C) Relative cell survival rate after 18 h culture of CD4<sup>+</sup>CD25<sup>+</sup> Tregs with or without Curcumin or GO-Y030. Data are one representative at more than three independent experiments. (D) Absolute number of cells after 18 h culture of CD4<sup>+</sup>CD25<sup>+</sup> Tregs with or without Curcumin or GO-Y030. The starting number of cells in each wells was 1 x 10<sup>5</sup> cells. (E) Foxp3-GFP positive cells in CD4<sup>+</sup> population. Foxp3-GFP positive cells were purified by FACS-Aria II (>95%) and cultured 18 h with CD3 + CD28. Data are one representative at three independent experiments. GITR (F) and CTLA4 (G) in CD4<sup>+</sup>Foxp3<sup>+</sup> Treg populations in Figure. 5A. Gray; Isotype control, Black; GITR or CTLA4. Data are one representative at three independent experiments. One-way analysis of variance with Tukey employed for statistic difference.

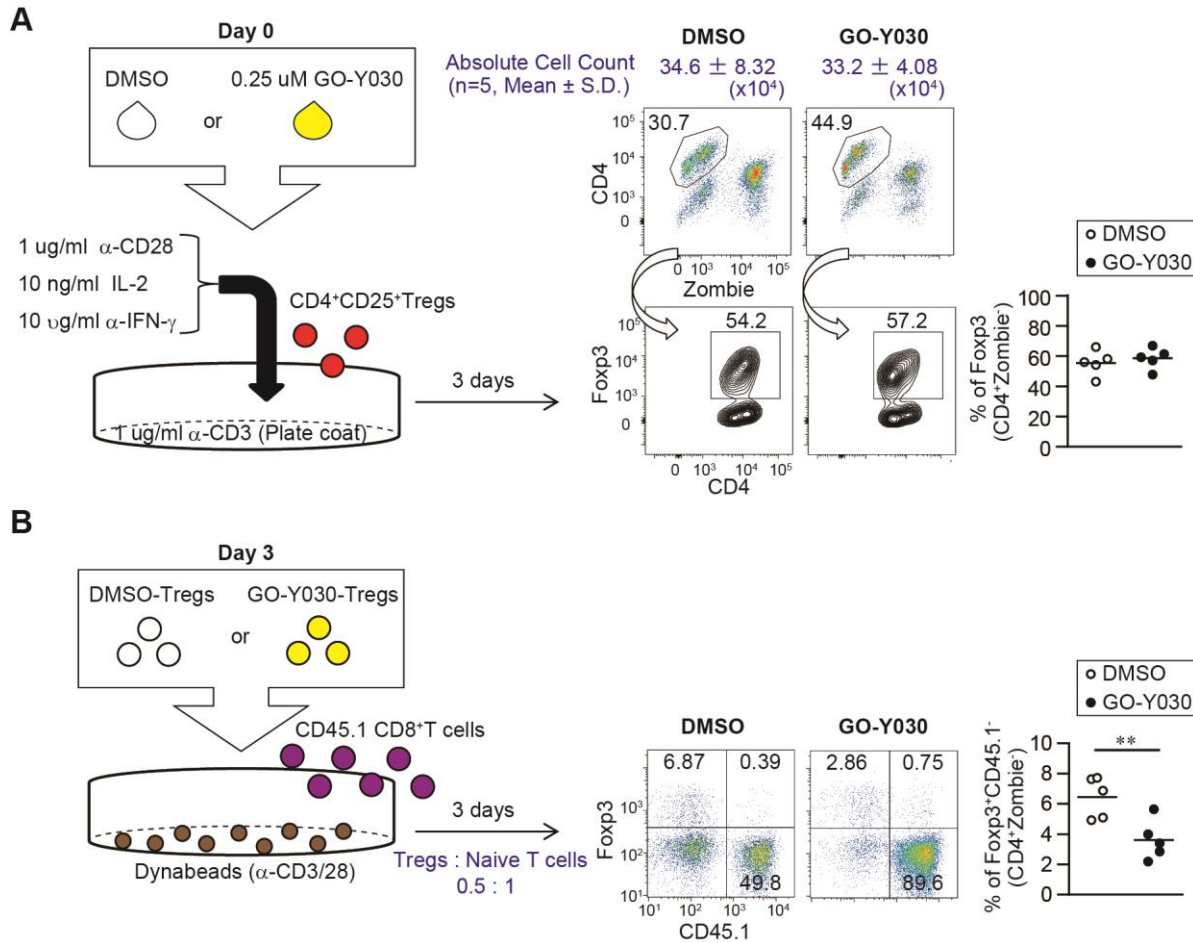

**Supplemental Figure 10: GO-Y030 controls IL-2/STAT5 axis in CD4<sup>+</sup>CD25<sup>+</sup> Tregs.**

(A) Percentage of Foxp3 in cultured CD4<sup>+</sup>CD25<sup>+</sup>Tregs at day three. Data are representative at five independent experiments. Student T-test was employed. (B) Percentage of Foxp3 in cultured CD4<sup>+</sup>CD25<sup>+</sup> Tregs in the suppression assay. DMSO- or GO-Y030-treated CD4<sup>+</sup>CD25<sup>+</sup> Tregs were co-cultured with CD8<sup>+</sup> T cells (Tregs:CD8<sup>+</sup> T cells=0.5:1) for three days. Data are representative at shows five independent experiments. Student T-test was employed.

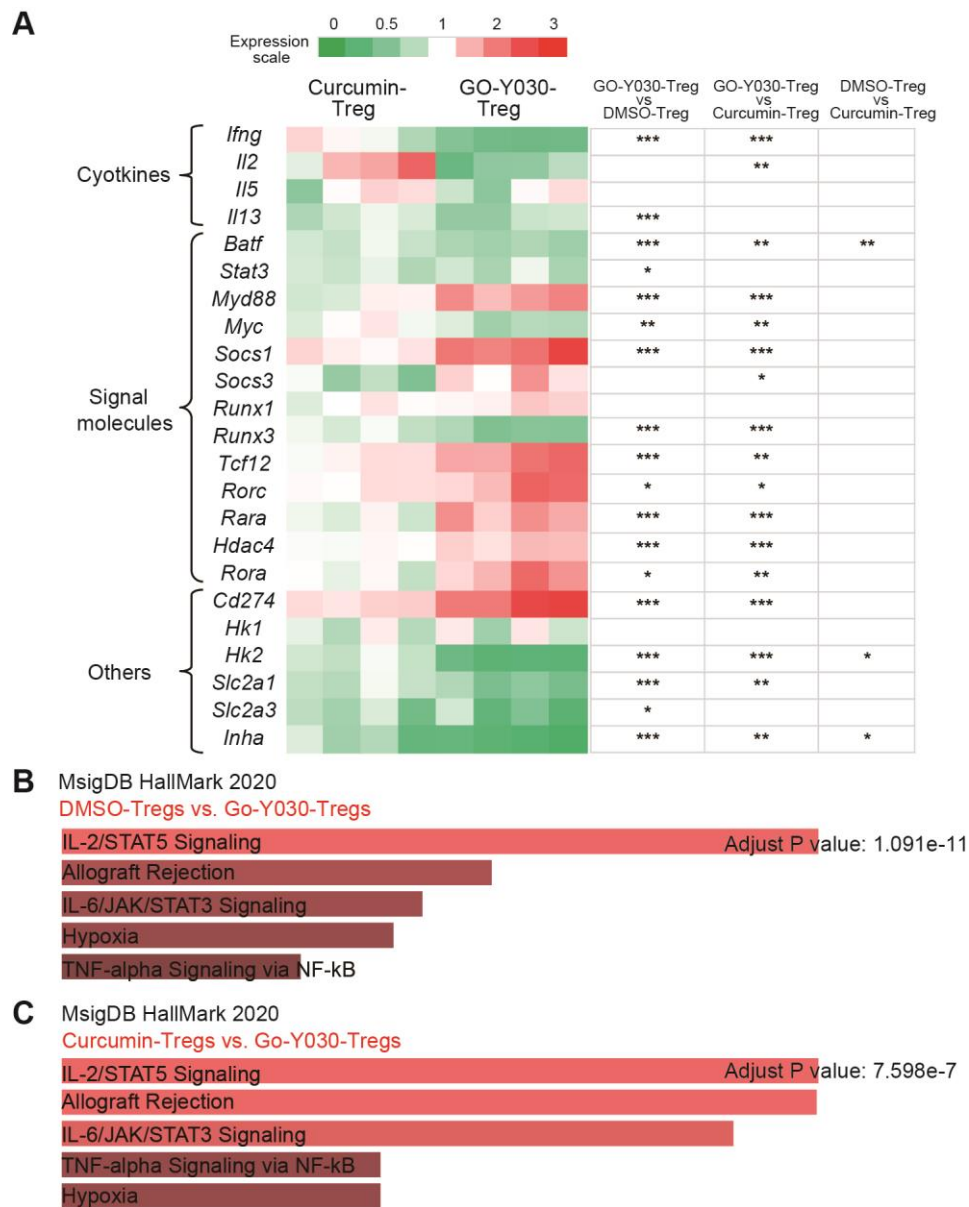

**Supplemental Figure 11: GO-Y030 controls IL-2/STAT5 axis in CD4<sup>+</sup>CD25<sup>+</sup> Tregs.**

(A) Real time PCRs in 72 h culture of CD4<sup>+</sup>CD25<sup>+</sup> Tregs with or without Curcumin or GO-Y030. The color scale is shown at the top of heat map. Each genes expression of DMSO-treated Tregs are as set as “1”. Data showed four independent experiments. (B, C) Enrichr- was used to calculate enrichment scores of signaling pathways. We selected genes of significantly difference expression ( $P < 0.05$ ) between DMSO-Tregs and GO-Y030-Tregs (B, <https://maayanlab.cloud/Enrichr/enrich?dataset=ce1ae4783a07360aa829bddb0fd36eb1>) or Curcumin-Tregs and GO-Y030-Tregs (C, <https://maayanlab.cloud/Enrichr/enrich?dataset=35a8b176b017fbd7c09576aa75995cd>). Statistical analyses (One-way analysis of variance with Tukey) were performed.

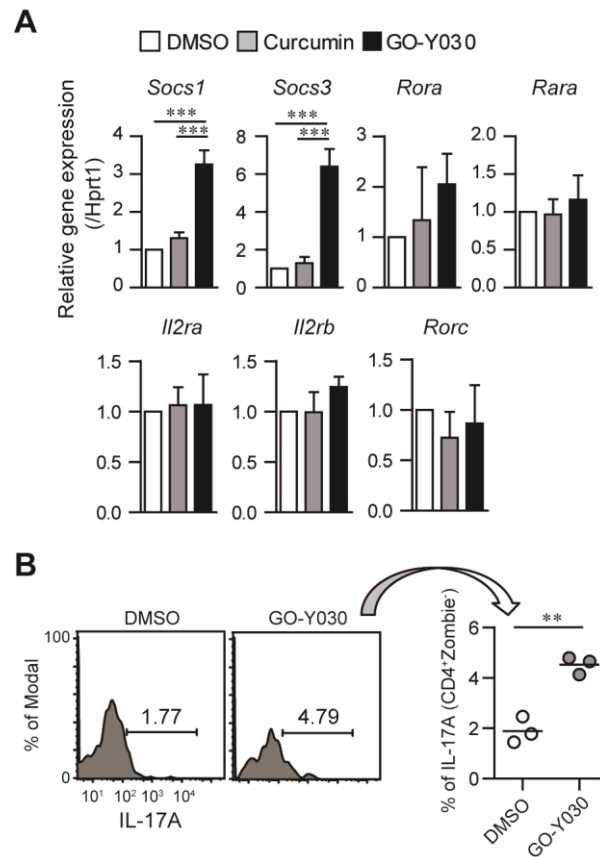

**Supplemental Figure 12: GO-Y030 controls IL-2/STAT5 axis in CD4<sup>+</sup>Foxp3-GFP<sup>+</sup> Tregs.**

(A) Real time PCRs in 72 h culture of CD4<sup>+</sup>Foxp3-GFP<sup>+</sup> Tregs with or without 1  $\mu$ m Curcumin or 0.25  $\mu$ m GO-Y030. Data pooled three independent experiments. Statistical analyses (One-way analysis of variance with Tukey) were performed. (B). Th17 population in cultured CD4<sup>+</sup>Foxp3-GFP<sup>+</sup> Tregs with or without 0.25  $\mu$ m GO-Y030. Student T-test was performed.



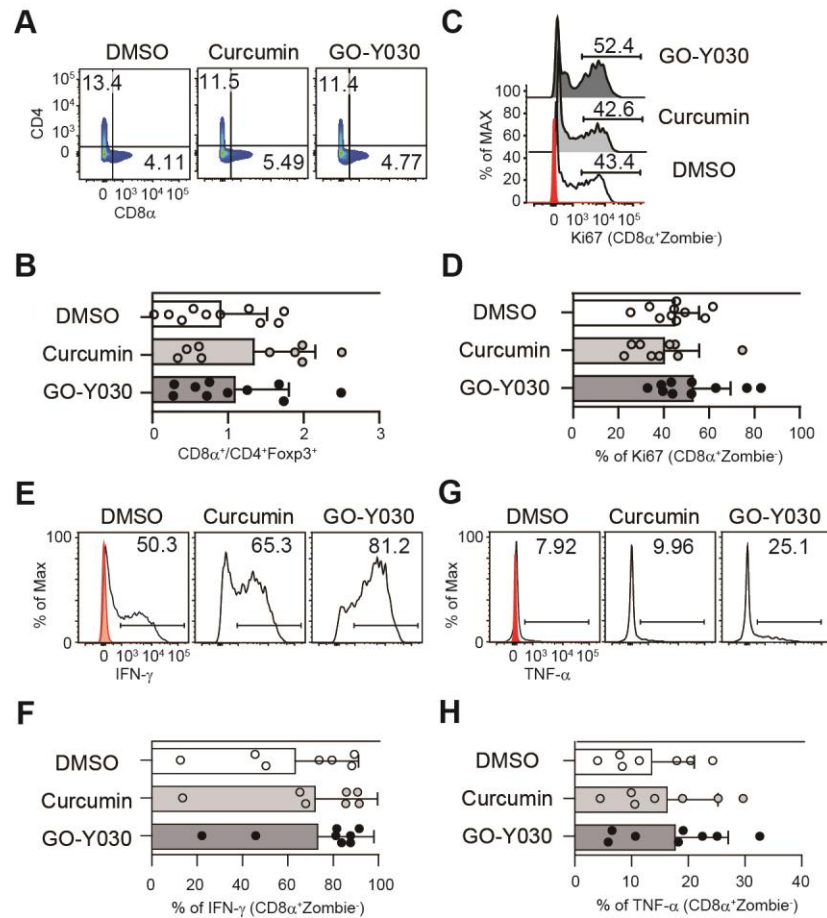

**Supplemental Figure 13: GO-Y030 did not prevent infiltration and activation of CD8<sup>+</sup> cells in tumor microenvironment.**

(A) Frequency of CD4<sup>+</sup>/CD8α<sup>+</sup> cells in tumor infiltrate lymphocytes. (B) Ratio of tumor infiltrate CD8<sup>+</sup> cells to CD4<sup>+</sup>Foxp3<sup>+</sup> Treg cells. (C, D) Ki67 expression in CD8α<sup>+</sup> cells in tumor infiltrate lymphocytes. Red; isotype control. Data are one representative of each of the two independent experiments (A, C). (E, F) IFN-γ production from CD8α<sup>+</sup> cells in tumor infiltrate lymphocytes. Red; isotype control. (G, H) TNF-α production from CD8α<sup>+</sup> cells in tumor infiltrate lymphocytes. Red; isotype control. One-way analysis of variance with post-hoc Tukey's multiple comparisons test was used (B, D, F, H). The graph shows mean and standard deviation.
